# Supplementary material
Source: HighWire-hosted journal article supplement (https://erj.ersjournals.com/content/58/6/2004053)
Supplement: inline-supplementary-material-3 [file inline-supplementary-material-3.pdf]

Supplementary Table S3: Pearson's correlation data for FVC, 6MWD and GAP index versus lipid/lipoproteins for subjects with IPF and healthy controls from the discovery cohort as well as IPF subjects in the validation cohort.

|                          | <u>FVC</u>       |             |                  |             |                   |             | <u>6MWD</u>      |    |                  |             |                   |             | <u>GAP Index</u> |   |                  |             |                   |              |
|--------------------------|------------------|-------------|------------------|-------------|-------------------|-------------|------------------|----|------------------|-------------|-------------------|-------------|------------------|---|------------------|-------------|-------------------|--------------|
|                          | Healthy Controls |             | Discovery Cohort |             | Validation Cohort |             | Healthy Controls |    | Discovery Cohort |             | Validation Cohort |             | Healthy Controls |   | Discovery Cohort |             | Validation Cohort |              |
|                          | r                | p           | r                | p           | r                 | p           | r                | p  | r                | p           | r                 | p           | r                | p | r                | p           | r                 | p            |
| TC                       | 0.12             | ns          | 0.22             | ns          | -0.11             | ns          | -0.05            | ns | 0.26             | ns          | -0.06             | ns          | -                | - | -0.29            | <b>0.03</b> | -0.02             | ns           |
| HDL-C                    | 0.08             | ns          | 0.03             | ns          | -0.08             | ns          | -0.16            | ns | 0.02             | ns          | -0.03             | ns          | -                | - | 0.00             | ns          | 0.01              | ns           |
| LDL-C                    | 0.11             | ns          | 0.18             | ns          | -0.05             | ns          | 0.03             | ns | 0.21             | ns          | -0.16             | ns          | -                | - | -0.25            | ns          | -0.13             | ns           |
| LogTG                    | -0.08            | ns          | 0.13             | ns          | 0.00              | ns          | 0.03             | ns | 0.14             | ns          | 0.04              | ns          | -                | - | -0.19            | ns          | 0.05              | ns           |
| APOA1                    | -0.04            | ns          | 0.15             | ns          | 0.06              | ns          | -0.23            | ns | 0.07             | ns          | -0.05             | ns          | -                | - | -0.11            | ns          | -0.12             | ns           |
| APOB                     | 0.07             | ns          | 0.19             | ns          | -0.07             | ns          | -0.01            | ns | 0.21             | ns          | -0.10             | ns          | -                | - | -0.22            | ns          | -0.03             | ns           |
| TC <sub>NMR</sub>        | 0.06             | ns          | 0.27             | <b>0.04</b> | 0.00              | ns          | -0.03            | ns | 0.28             | <b>0.04</b> | -0.14             | ns          | -                | - | -0.34            | <b>0.01</b> | -0.14             | 0.06         |
| HDL-C <sub>NMR</sub>     | 0.02             | ns          | -0.02            | ns          | 0.04              | ns          | -0.16            | ns | -0.01            | ns          | -0.04             | ns          | -                | - | 0.11             | ns          | -0.07             | ns           |
| LDL-C <sub>NMR</sub>     | 0.06             | ns          | 0.26             | <b>0.05</b> | -0.04             | ns          | 0.00             | ns | 0.28             | <b>0.04</b> | -0.11             | ns          | -                | - | -0.35            | <b>0.01</b> | -0.13             | 0.06         |
| LogTG <sub>NMR</sub>     | -0.05            | ns          | 0.19             | ns          | 0.05              | ns          | -0.01            | ns | 0.20             | ns          | 0.00              | ns          | -                | - | -0.25            | ns          | 0.02              | ns           |
| ApoA1 <sub>NMR</sub>     | -0.06            | ns          | 0.05             | ns          | 0.09              | ns          | -0.18            | ns | 0.03             | ns          | -0.02             | ns          | -                | - | 0.02             | ns          | -0.13             | 0.06         |
| ApoB <sub>NMR</sub>      | 0.04             | ns          | 0.25             | ns          | -0.02             | ns          | 0.00             | ns | 0.24             | ns          | -0.12             | ns          | -                | - | -0.35            | <b>0.01</b> | -0.11             | ns           |
| HDLP <sub>NMR</sub>      | -0.22            | ns          | 0.22             | ns          | 0.16              | <b>0.02</b> | -0.08            | ns | 0.20             | ns          | 0.11              | ns          | -                | - | -0.16            | ns          | -0.21             | <b>0.003</b> |
| LogL-HDLP <sub>NMR</sub> | 0.20             | ns          | -0.01            | ns          | -0.03             | ns          | -0.15            | ns | -0.06            | ns          | 0.03              | ns          | -                | - | 0.10             | ns          | 0.05              | ns           |
| LogM-HDLP <sub>NMR</sub> | 0.14             | ns          | -0.11            | ns          | 0.04              | ns          | 0.01             | ns | -0.19            | ns          | -0.10             | ns          | -                | - | 0.14             | ns          | -0.10             | ns           |
| S-HDLP <sub>NMR</sub>    | -0.25            | ns          | 0.29             | <b>0.03</b> | 0.17              | <b>0.01</b> | 0.00             | ns | 0.31             | <b>0.02</b> | 0.17              | 0.06        | -                | - | -0.29            | <b>0.03</b> | -0.15             | <b>0.03</b>  |
| LogH7P                   | -0.02            | ns          | -0.12            | ns          | -0.09             | ns          | -0.04            | ns | -0.07            | ns          | 0.01              | ns          | -                | - | 0.27             | ns          | 0.07              | ns           |
| LogH6P                   | 0.20             | ns          | -0.01            | ns          | 0.04              | ns          | -0.08            | ns | -0.08            | ns          | 0.05              | ns          | -                | - | 0.09             | ns          | -0.06             | ns           |
| LogH5P                   | -0.11            | ns          | -0.17            | ns          | -0.10             | ns          | -0.04            | ns | -0.01            | ns          | 0.11              | ns          | -                | - | 0.07             | ns          | 0.03              | ns           |
| H4P                      | -0.08            | ns          | 0.16             | ns          | 0.01              | ns          | -0.07            | ns | 0.17             | ns          | 0.02              | ns          | -                | - | -0.07            | ns          | -0.10             | ns           |
| H3P                      | 0.13             | ns          | -0.12            | ns          | 0.02              | ns          | 0.01             | ns | -0.24            | ns          | -0.06             | ns          | -                | - | 0.16             | ns          | -0.09             | ns           |
| H2P                      | -0.30            | <b>0.03</b> | 0.18             | ns          | 0.14              | 0.05        | -0.10            | ns | 0.15             | ns          | -0.04             | ns          | -                | - | -0.19            | ns          | -0.12             | ns           |
| LogH1P                   | 0.08             | ns          | 0.15             | ns          | 0.06              | ns          | 0.17             | ns | 0.20             | ns          | 0.24              | <b>0.01</b> | -                | - | -0.19            | ns          | -0.03             | ns           |

FVC, forced vital capacity; 6MWD, 6 minute walk distance; ns = not significant.
