# Supplementary material
Source: HighWire-hosted journal article supplement (https://erj.ersjournals.com/content/58/6/2004053)
Supplement: inline-supplementary-material-4 [file inline-supplementary-material-4.pdf]

## APPENDIX

List of Pulmonary Fibrosis Foundation Care Center Network sites that enrolled patients in the Pulmonary Fibrosis Foundation Patient Registry:

### ALABAMA

University of Alabama at Birmingham

### ARIZONA

St. Joseph's Hospital  
University of Arizona

### CALIFORNIA

Stanford Health Center  
University of California at Los Angeles  
University of California at San Francisco

### COLORADO

National Jewish Health

### CONNECTICUT

Yale School of Medicine

### FLORIDA

University of Miami

### GEORGIA

Piedmont Healthcare

### ILLINOIS

Northwestern Memorial Hospital  
University of Chicago

### KANSAS

The University of Kansas Hospital

### KENTUCKY

University of Louisville School of Medicine

### LOUISIANA

Tulane University School of Medicine

### MARYLAND

Johns Hopkins University  
University of Maryland Medical Center

### MASSACHUSETTS

Massachusetts General Hospital

### MICHIGAN

University of Michigan Health System

### MINNESOTA

University of Minnesota Medical Center  
Mayo Clinic

### MISSOURI

Washington University School of Medicine

### NEW YORK

Columbia University Medical Center  
Stony Brook University Hospital  
University of Rochester Medical Center  
Weill-Cornell Medical Center

### NORTH CAROLINA

Duke University Medical Center

### OHIO

The Ohio State University Wexner Medical Center  
University of Cincinnati Medical Center

### PENNSYLVANIA

Penn State Milton S. Hershey Medical Center  
Temple Health  
University of Pennsylvania  
University of Pittsburgh

### SOUTH CAROLINA

Medical University of South Carolina

### TENNESSEE

Vanderbilt University Medical Center

### TEXAS

University of Texas Southwestern Medical Center  
University of Texas Health Science Center (Houston)  
University of Texas Health Science Center (San Antonio)

### UTAH

University of Utah Health Care

### VIRGINIA

Inova Fairfax Medical Campus  
University of Virginia Health Systems

### WASHINGTON

University of Washington Medical Center
