# Supplementary material
Source: HighWire-hosted journal article supplement (https://erj.ersjournals.com/content/58/6/2004053)
Supplement: inline-supplementary-material-5 [file inline-supplementary-material-5.pdf]

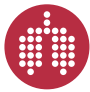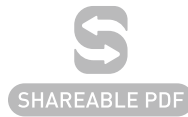

# Serum levels of small HDL particles are negatively correlated with death or lung transplantation in an observational study of idiopathic pulmonary fibrosis

Amisha V. Barochia <sup>1</sup>, Maryann Kaler <sup>1</sup>, Nargues Weir <sup>1,2</sup>, Elizabeth M. Gordon <sup>1</sup>, Debbie M. Figueroa <sup>1</sup>, Xianglan Yao <sup>1</sup>, Merte Lemma WoldeHanna <sup>2</sup>, Maureen Sampson <sup>3</sup>, Alan T. Remaley <sup>4</sup>, Geraldine Grant <sup>5</sup>, Scott D. Barnett <sup>2</sup>, Steven D. Nathan <sup>2</sup> and Stewart J. Levine <sup>1</sup>

<sup>1</sup>Laboratory of Asthma and Lung Inflammation, Pulmonary Branch, NHLBI, NIH, Bethesda, MD, USA. <sup>2</sup>Advanced Lung Disease and Transplant Program, Inova Fairfax Hospital, Falls Church, VA, USA. <sup>3</sup>Clinical Center, NIH, Bethesda, MD, USA. <sup>4</sup>Translational Vascular Medicine Branch, NHLBI, NIH, Bethesda, MD, USA. <sup>5</sup>Dept of Biology, George Mason University, Manassas, VA, USA.

Corresponding author: Amisha V. Barochia ([barochiaav@nhlbi.nih.gov](mailto:barochiaav@nhlbi.nih.gov))

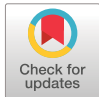

Shareable abstract (@ERSpublications)

This is the first study showing that higher serum levels of small HDL particles correlate with a lower risk of death or lung transplantation in patients with idiopathic pulmonary fibrosis, suggesting that they may be important in IPF pathobiology <https://bit.ly/2RG4UGS>

**Cite this article as:** Barochia AV, Kaler M, Weir N, *et al.* Serum levels of small HDL particles are negatively correlated with death or lung transplantation in an observational study of idiopathic pulmonary fibrosis. *Eur Respir J* 2021; 58: 2004053 [DOI: 10.1183/13993003.04053-2020].

This single-page version can be shared freely online.

## Abstract

**Background** Serum lipoproteins, such as high-density lipoproteins (HDL), may influence disease severity in idiopathic pulmonary fibrosis (IPF). Here, we investigated associations between serum lipids and lipoproteins and clinical end-points in IPF.

**Methods** Clinical data and serum lipids were analysed from a discovery cohort (59 IPF subjects, 56 healthy volunteers) and validated using an independent, multicentre cohort (207 IPF subjects) from the Pulmonary Fibrosis Foundation registry. Associations between lipids and clinical end-points (forced vital capacity, 6-min walk distance, gender age physiology (GAP) index, death or lung transplantation) were examined using Pearson's correlation and multivariable analyses.

**Results** Serum concentrations of small HDL particles measured using nuclear magnetic resonance spectroscopy (S-HDLP<sub>NMR</sub>) correlated negatively with the GAP index in the discovery cohort of IPF subjects. The negative correlation of S-HDLP<sub>NMR</sub> with GAP index was confirmed in the validation cohort of IPF subjects. Higher levels of S-HDLP<sub>NMR</sub> were associated with lower odds of death or its competing outcome, lung transplantation (OR 0.9 for each 1- $\mu\text{mol}\cdot\text{L}^{-1}$  increase in S-HDLP<sub>NMR</sub>,  $p < 0.05$ ), at 1, 2 and 3 years from study entry in a combined cohort of all IPF subjects.

**Conclusions** Higher serum levels of S-HDLP<sub>NMR</sub> are negatively correlated with the GAP index, as well as with lower observed mortality or lung transplantation in IPF subjects. These findings support the hypothesis that S-HDLP<sub>NMR</sub> may modify mortality risk in patients with IPF.

The content of this work is not subject to copyright. Design and branding are copyright ©ERS 2021. For commercial reproduction rights and permissions contact [permissions@ersnet.org](mailto:permissions@ersnet.org)

This article has supplementary material available from [erj.ersjournals.com](http://erj.ersjournals.com)

Received: 3 Nov 2020  
Accepted: 13 April 2021
